# Supplementary material for: Liposomal formulation of a gold(iii) metalloantibiotic: a promising strategy against antimicrobial resistance
Source: Royal Society of Chemistry journal article supplement (doi:10.1039/d4dt01867b), 2024-01-01
Supplement: d4dt01867b1.pdf [file d4dt01867b1.pdf]

## *Supporting Information*

# **Liposomal Formulation of a Gold(III) Metalloantibiotic: A Promising Strategy Against Antimicrobial Resistance.**

Alejandro Llamedo,<sup>a,b</sup> Pablo Rodríguez,<sup>a</sup> Yaiza Gabasa,<sup>c,d</sup> Raquel G. Soengas,<sup>b,\*</sup> Humberto Rodríguez-Solla,<sup>b</sup> David Elorriaga,<sup>b</sup> Francisco J. García-Alonso<sup>b,\*</sup> and Sara M. Soto,<sup>c,d,\*</sup>

<sup>a</sup>Nanovex Biotechnologies S.L., Parque Tecnológico de Asturias Edificio CEEI, 33428 Llanera, Spain.

<sup>b</sup>Departamento de Química Orgánica e Inorgánica, Instituto Universitario de Química Organometálica “Enrique Moles”, Universidad de Oviedo, Julián Clavería 8, 33006 Oviedo, Spain.

<sup>c</sup>ISGlobal, Hospital Clínic - Universitat de Barcelona, Barcelona, Spain.

<sup>d</sup>CIBER Enfermedades Infecciosas (CIBERINFEC), Instituto de Salud Carlos III, Madrid, Spain.

[rsoengas@uniovi.es](mailto:rsoengas@uniovi.es), [sara.soto@isglobal.org](mailto:sara.soto@isglobal.org), [fjga@uniovi.es](mailto:fjga@uniovi.es)

### **Contents**

|                                 |    |
|---------------------------------|----|
| I. NMR Spectra.....             | S2 |
| II. Antibacterial Activity..... | S4 |
| III. X-Ray Analysis.....        | S5 |

## I. NMR Spectra

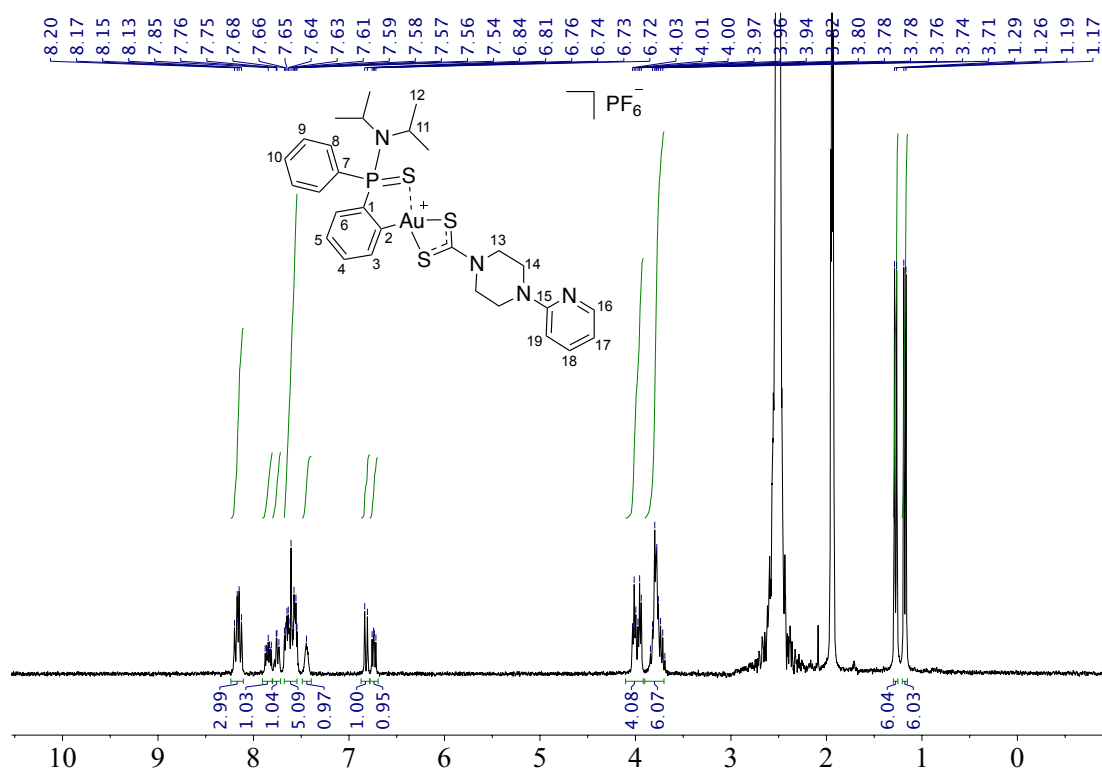

**Figure S1.** <sup>1</sup>H NMR of AuPyPZ in CD<sub>3</sub>CN.

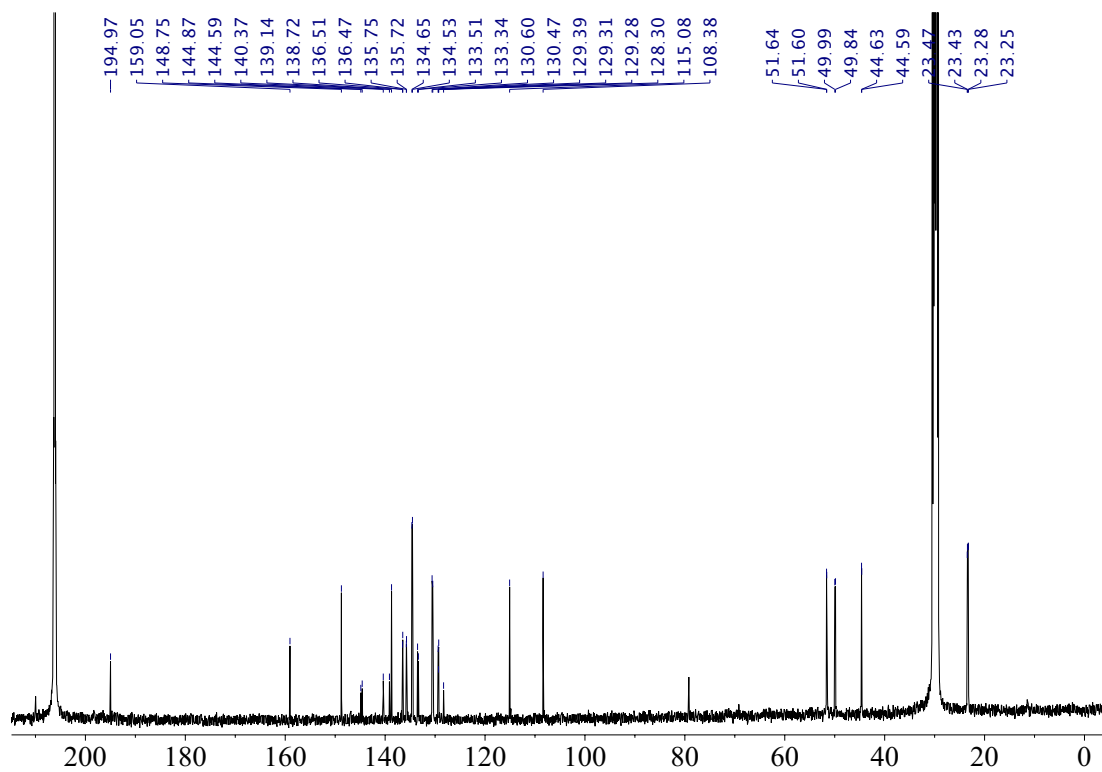

**Figure S2.** <sup>13</sup>C NMR of AuPyPZ in (CD<sub>3</sub>)<sub>2</sub>CO.

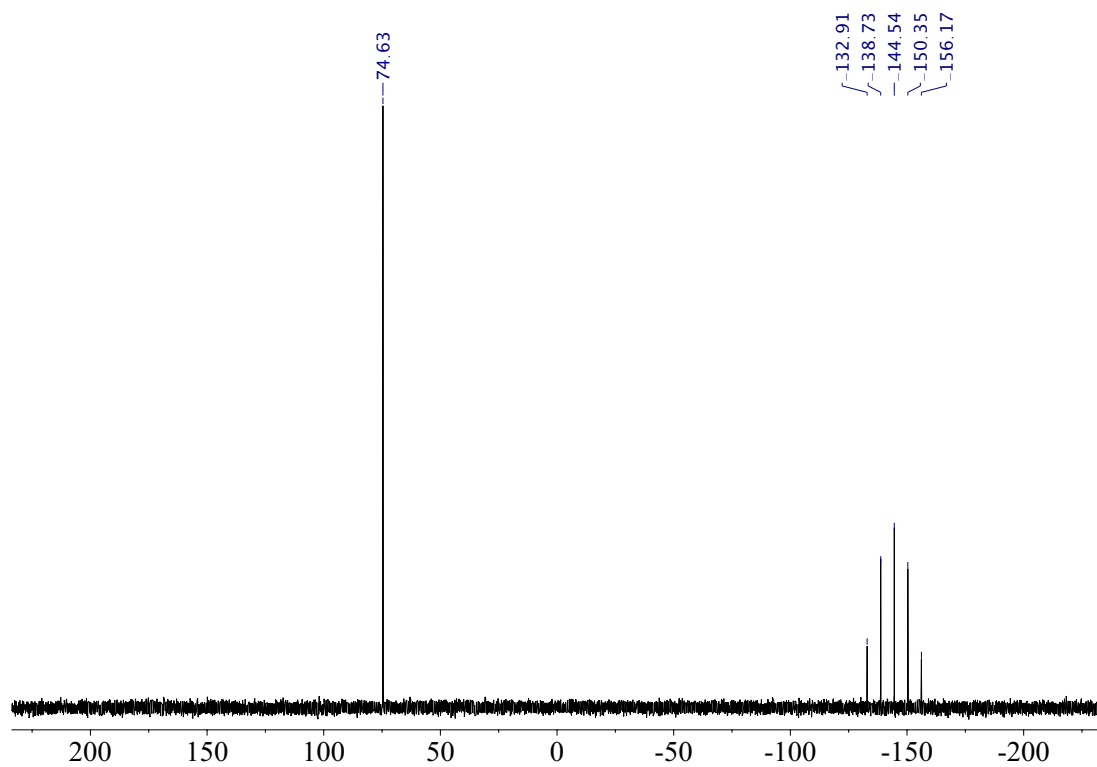

**Figure S3.**  $^{31}\text{P}$  NMR of AuPyPZ in  $\text{CD}_3\text{CN}$ .

## II. Antibacterial Activity

**Table S1.** Strains tested and minimal inhibitory concentrations obtained for AuPyPZ complex.

| Entry | Strain ID    | Species               | Resistance                                             | MIC (mg/L)<br>AuPyPZ |
|-------|--------------|-----------------------|--------------------------------------------------------|----------------------|
| 1     | 162065-705   | <i>S. aureus</i>      | CIP, LVX, CLI, ERI, PEN                                | 0.5                  |
| 2     | 163501-000   | <i>S. aureus</i>      | CIP, CLI, ERI, LVX                                     | 0.5                  |
| 3     | 162071-210   | <i>S. aureus</i>      | CIP, CLI, ERI, LVX                                     | 0.5                  |
| 4     | 162058-967   | <i>S. aureus</i>      | AMK, TET, CIP, CHL, ERI, VAN                           | 1                    |
| 5     | ATCC® 29213  | <i>S. aureus</i>      |                                                        | 1                    |
| 6     | FG22014      | <i>S. epidermidis</i> | PEN, CTX, CRO, CIP, CHL, ERI                           | 1                    |
| 7     | FG03015      | <i>S. epidermidis</i> | OXA, PEN, CTX, CIP, ERI                                | 1                    |
| 8     | FG14013      | <i>S. epidermidis</i> | OXA, PEN, CTX, GEN, CIP,<br>CHL, ERI                   | 1                    |
| 9     | 9510-524     | <i>S. maltophilia</i> | CAZ, SXT                                               | 4                    |
| 10    | 895          | <i>S. maltophilia</i> | LVX, CAZ, CHL, SXT                                     | 4                    |
| 11    | 166097-953   | <i>P. aeruginosa</i>  | TOB, GEN, CIP, AZT, LVX, IMP                           | 16                   |
| 12    | 30302995-242 | <i>P. aeruginosa</i>  | GEN, TOB, TZP, CIP,<br>IMP, MEM, AZT, LVX, IMP,<br>DOR | 16                   |
| 13    | ATCC® 27853  | <i>P. aeruginosa</i>  |                                                        | 16                   |
| 14    | E4           | <i>E. coli</i>        | CHL, GEN, NAL, TET, SXT, RIF                           | 16                   |
| 15    | E8           | <i>E. coli</i>        | CHL, GEN, CIP, NAL, TET,<br>SXT, RIF                   | 8                    |
| 16    | E11          | <i>E. coli</i>        | CHL, GEN, CIP, NAL, TET,<br>SXT, RIF                   | 8                    |
| 17    | ATCC® 25922  | <i>E. coli</i>        |                                                        | 8                    |
| 18    | AbCr17       | <i>A. baumannii</i>   | CST                                                    | 2                    |
| 19    | Ab177        | <i>A. baumannii</i>   |                                                        | 2                    |
| 20    | Ab210        | <i>A. baumannii</i>   | CST                                                    | 4                    |
| 21    | ATCC® 19606  | <i>A. baumannii</i>   |                                                        | 2                    |

**Table S2.** Strains tested and minimal inhibitory concentrations (MICs) obtained for liposomal AuPyPZ complex.

| Entry | Strain ID      | Species               | Resistance                           | MIC (mg/L)<br>Liposomal<br>AuPyPZ |
|-------|----------------|-----------------------|--------------------------------------|-----------------------------------|
| 1     | 162065-705     | <i>S. aureus</i>      | CIP, LVX, CLI, ERI, PEN              | 0.5                               |
| 2     | 163501-000     | <i>S. aureus</i>      | CIP, CLI, ERI, LVX                   | 1                                 |
| 3     | 162071-210     | <i>S. aureus</i>      | CIP, CLI, ERI, LVX                   | 0.5                               |
| 4     | 162058-967     | <i>S. aureus</i>      | AMK, TET, CIP, CHL, ERI,<br>VAN      | 1                                 |
| 5     | ATCC®<br>29213 | <i>S. aureus</i>      |                                      | 1                                 |
| 6     | FG22014        | <i>S. epidermidis</i> | PEN, CTX, CRO, CIP, CHL, ERI         | 0.5                               |
| 7     | FG03015        | <i>S. epidermidis</i> | OXA, PEN, CTX, CIP, ERI              | 0.5                               |
| 8     | FG14013        | <i>S. epidermidis</i> | OXA, PEN, CTX, GEN, CIP,<br>CHL, ERI | 0.25                              |

### III. X-Ray Analysis

**Table S3.** Crystal data and structure refinement for **AuPyPz**.

| Identification code                         | <b>AuPyPz</b>                                                                                                                |
|---------------------------------------------|------------------------------------------------------------------------------------------------------------------------------|
| Empirical formula                           | C <sub>57</sub> H <sub>71</sub> Au <sub>2</sub> Cl <sub>3</sub> F <sub>12</sub> N <sub>8</sub> P <sub>4</sub> S <sub>6</sub> |
| Formula weight                              | 1912.74                                                                                                                      |
| Temperature/K                               | 273                                                                                                                          |
| Crystal system                              | triclinic                                                                                                                    |
| Space group                                 | P-1                                                                                                                          |
| a/Å                                         | 11.5343(3)                                                                                                                   |
| b/Å                                         | 15.5640(3)                                                                                                                   |
| c/Å                                         | 21.2129(5)                                                                                                                   |
| α/°                                         | 95.849(2)                                                                                                                    |
| β/°                                         | 98.779(2)                                                                                                                    |
| γ/°                                         | 102.500(2)                                                                                                                   |
| Volume/Å <sup>3</sup>                       | 3638.20(15)                                                                                                                  |
| Z                                           | 2                                                                                                                            |
| ρ <sub>calc</sub> /cm <sup>3</sup>          | 1.746                                                                                                                        |
| μ/mm <sup>-1</sup>                          | 11.566                                                                                                                       |
| F(000)                                      | 1884.0                                                                                                                       |
| Crystal size/mm <sup>3</sup>                | 0.219 × 0.154 × 0.099                                                                                                        |
| Radiation                                   | Cu Kα (λ = 1.54184)                                                                                                          |
| 2θ range for data collection/°              | 5.874 to 139.104                                                                                                             |
| Index ranges                                | -13 ≤ h ≤ 13, -18 ≤ k ≤ 18, -23 ≤ l ≤ 25                                                                                     |
| Reflections collected                       | 34851                                                                                                                        |
| Independent reflections                     | 13442 [R <sub>int</sub> = 0.0338, R <sub>sigma</sub> = 0.0353]                                                               |
| Data/restraints/parameters                  | 13442/921/1024                                                                                                               |
| Goodness-of-fit on F <sup>2</sup>           | 1.030                                                                                                                        |
| Final R indexes [I ≥ 2σ (I)]                | R <sub>1</sub> = 0.0385, wR <sub>2</sub> = 0.1007                                                                            |
| Final R indexes [all data]                  | R <sub>1</sub> = 0.0444, wR <sub>2</sub> = 0.1067                                                                            |
| Largest diff. peak/hole / e Å <sup>-3</sup> | 0.68/-1.19                                                                                                                   |
